# Supplementary material for: Aβ accumulation causes MVB enlargement and is modelled by dominant negative VPS4A
Source: Springer Nature journal article supplement (doi:10.1186/s13024-017-0203-y), 2017-08-23
Supplement: MOESM1 [file 14235872]

Table S1

| Antibody               | Target Epitope                                                                      | Species and type  | Dilution (WB) | Dilution (IF) | Source                    | Cat. #                       |
|------------------------|-------------------------------------------------------------------------------------|-------------------|---------------|---------------|---------------------------|------------------------------|
| 369                    | Human/mouse full length APP, $\alpha/\beta$ CTFs, APP C-terminus                    | Rabbit polyclonal | 1:1000        |               | Buxbaum et al. 1990 [29]  |                              |
| 6E10                   | Human $A\beta$ , full length APP, sAPP $\alpha$ , $\beta$ CTF, a.a. 3-8 of $A\beta$ | Mouse monoclonal  | 1:1000        | 1:500         | BioLegend                 | previously Covance SIG-39320 |
| 12F4                   | Human/mouse $A\beta$ x-42, C-terminus specific                                      | Mouse monoclonal  |               | 1:250         | BioLegend                 | Previously Covance SIG-39142 |
| Amyloid $\beta$ (1-42) |                                                                                     | Rabbit polyclonal |               | 1:250         | IBL                       | 18582                        |
| Amyloid $\beta$ (1-42) | Human/mouse $A\beta$ x-42, C-terminus specific                                      | Rabbit polyclonal |               | 1:1000        | Invitrogen                | 700254                       |
| $\beta$ -actin         |                                                                                     | Mouse monoclonal  | 1:2000        |               | Sigma                     | A 5316                       |
| CD63                   |                                                                                     | Mouse monoclonal  | 1:1000        |               | ThermoFisher Scientific   | MAI-19281                    |
| CHMP2B                 |                                                                                     | Rabbit polyclonal | 1:1000        | 1:250         | Abcam                     | ab33174                      |
| Clavestin-1+2          |                                                                                     | Rabbit polyclonal |               | 1:250         | Bioss                     | bs-6569R-A647                |
| DAPI                   |                                                                                     |                   |               | 1:1500        | Sigma                     | D9542                        |
| Drebrin                |                                                                                     | Rabbit polyclonal |               | 1:1000        | Abcam                     | ab11068                      |
| FLAG                   | DYKDDDDK                                                                            | Rat               | 1:1000        | 1:1000        | Biolegend                 | 637302                       |
| Flotillin-1            |                                                                                     | Mouse monoclonal  |               | 1:400         | BD Biosciences            | 610821                       |
| GM130                  |                                                                                     | Mouse monoclonal  |               | 1:500         | BD Biosciences            | 610822                       |
| GSK3 $\beta$           |                                                                                     | Rabbit monoclonal | 1:1000        | 1:400         | Cell Signaling Technology | 12456                        |
| pGSK $\alpha/\beta$    |                                                                                     | Rabbit polyclonal | 1:1000        |               | Cell Signaling Technology | 9331S                        |
| HA-Tag                 |                                                                                     | Rabbit monoclonal | 1:1000        |               | Cell Signaling Technology | 3724                         |
| Hrs and Hrs-2          |                                                                                     | Mouse monoclonal  |               | 1:100         | Enzo                      | ALX-804-382-C050             |
| LAMP1                  |                                                                                     | Rabbit polyclonal |               | 1:1000        | Abcam                     | ab24170                      |
| LAMP1                  |                                                                                     | Rat monoclonal    |               | 1:1500        | Abcam                     | ab25245                      |
| LC3 $\beta$            |                                                                                     | Rabbit polyclonal | 1:1000        |               | Cell Signaling Technology | 2775                         |
| OC                     | Amyloid fibrils                                                                     | Rabbit polyclonal |               | 1:1000        | Merck Millipore           | AB2286                       |
| P2:1                   | Human APP, N-terminus, a.a. 104-118 of APP                                          | Mouse monoclonal  |               | 1:500         | ThermoFisher Scientific   | OMA1-03132                   |
| Phospho-tau pSer396    |                                                                                     | Rabbit polyclonal | 1:1000        |               | ThermoFisher              | 44-752G                      |
| Rab7                   |                                                                                     | Mouse monoclonal  |               | 1:500         | Abcam                     | ab50533                      |
| Synapto-physin         |                                                                                     | Mouse monoclonal  |               | 1:1000        | Merck Millipore           | MAB5258                      |
| Tsg101                 |                                                                                     | Mouse monoclonal  |               | 1:250         | Genetex                   | GTX70255                     |
| VPS4                   |                                                                                     | Mouse monoclonal  | 1:1000        | 1:100         | SantaCruz                 | sc-133122                    |
