# Supplementary material for: Aβ accumulation causes MVB enlargement and is modelled by dominant negative VPS4A
Source: Springer Nature journal article supplement (doi:10.1186/s13024-017-0203-y), 2017-08-23

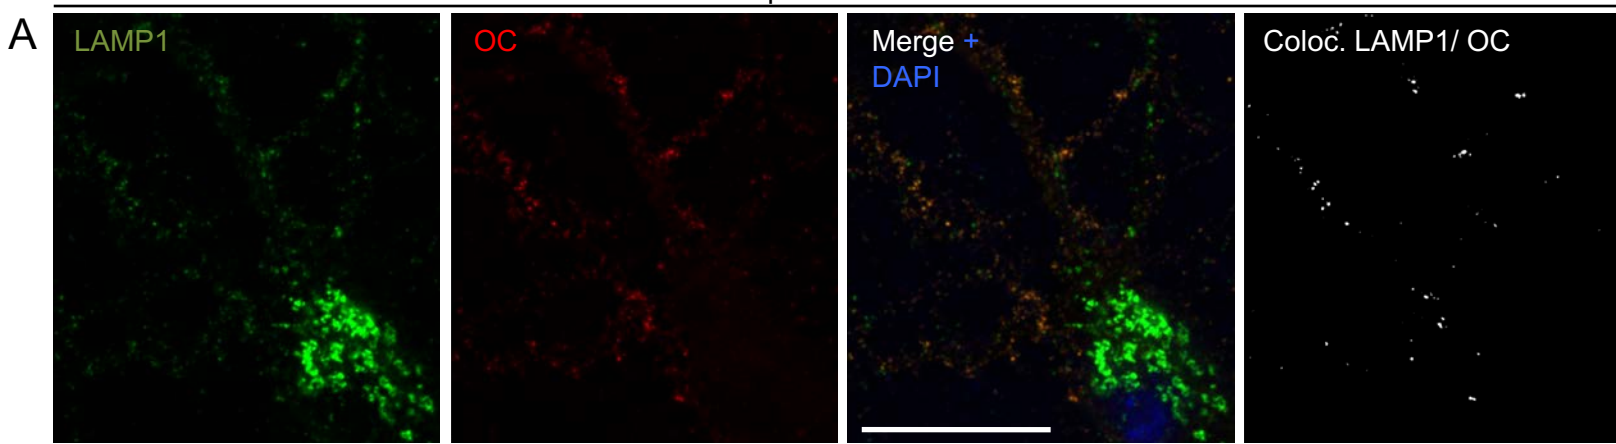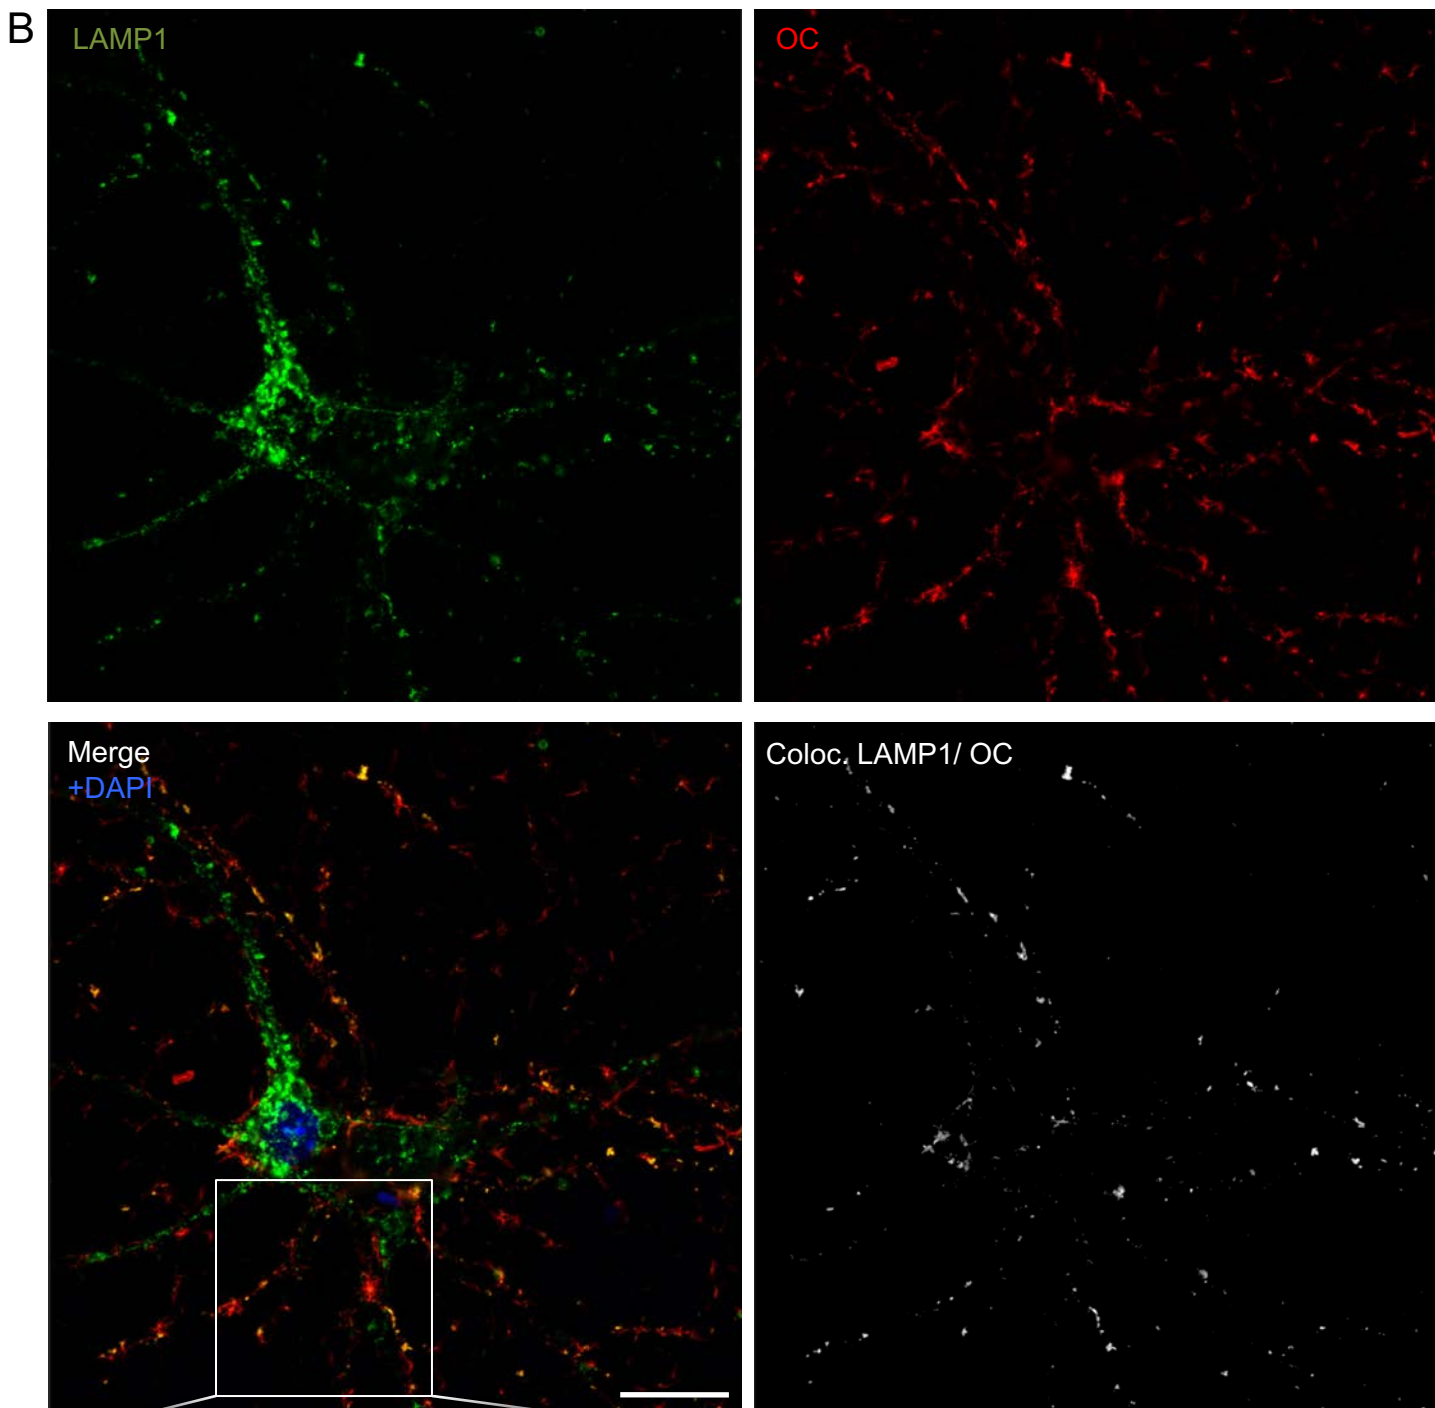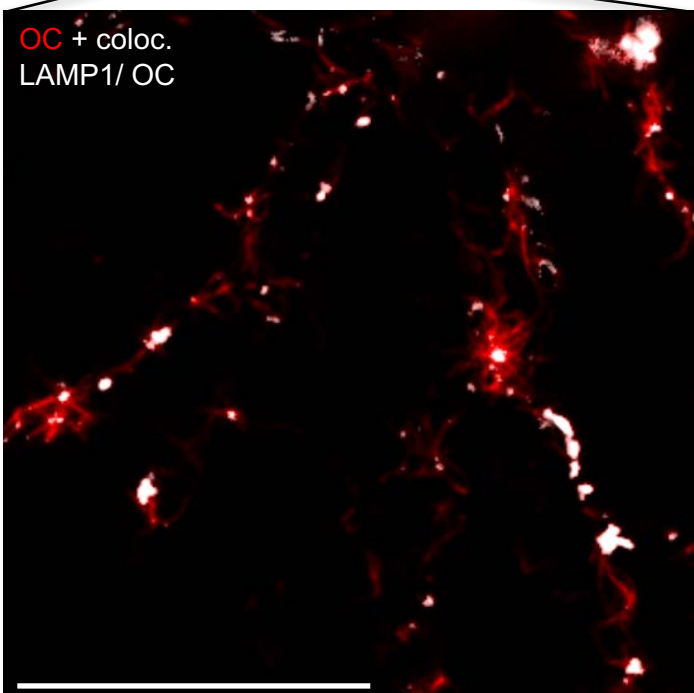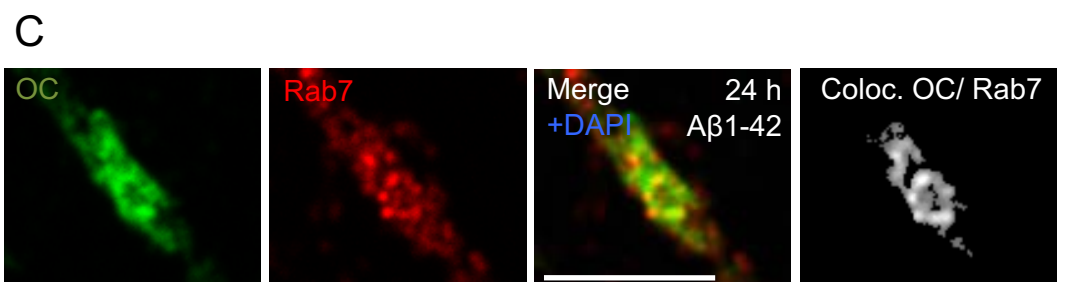

Supplement: MOESM4 [file 14235872]
