# Supplementary material for: Aβ accumulation causes MVB enlargement and is modelled by dominant negative VPS4A
Source: Springer Nature journal article supplement (doi:10.1186/s13024-017-0203-y), 2017-08-23

Figure S7

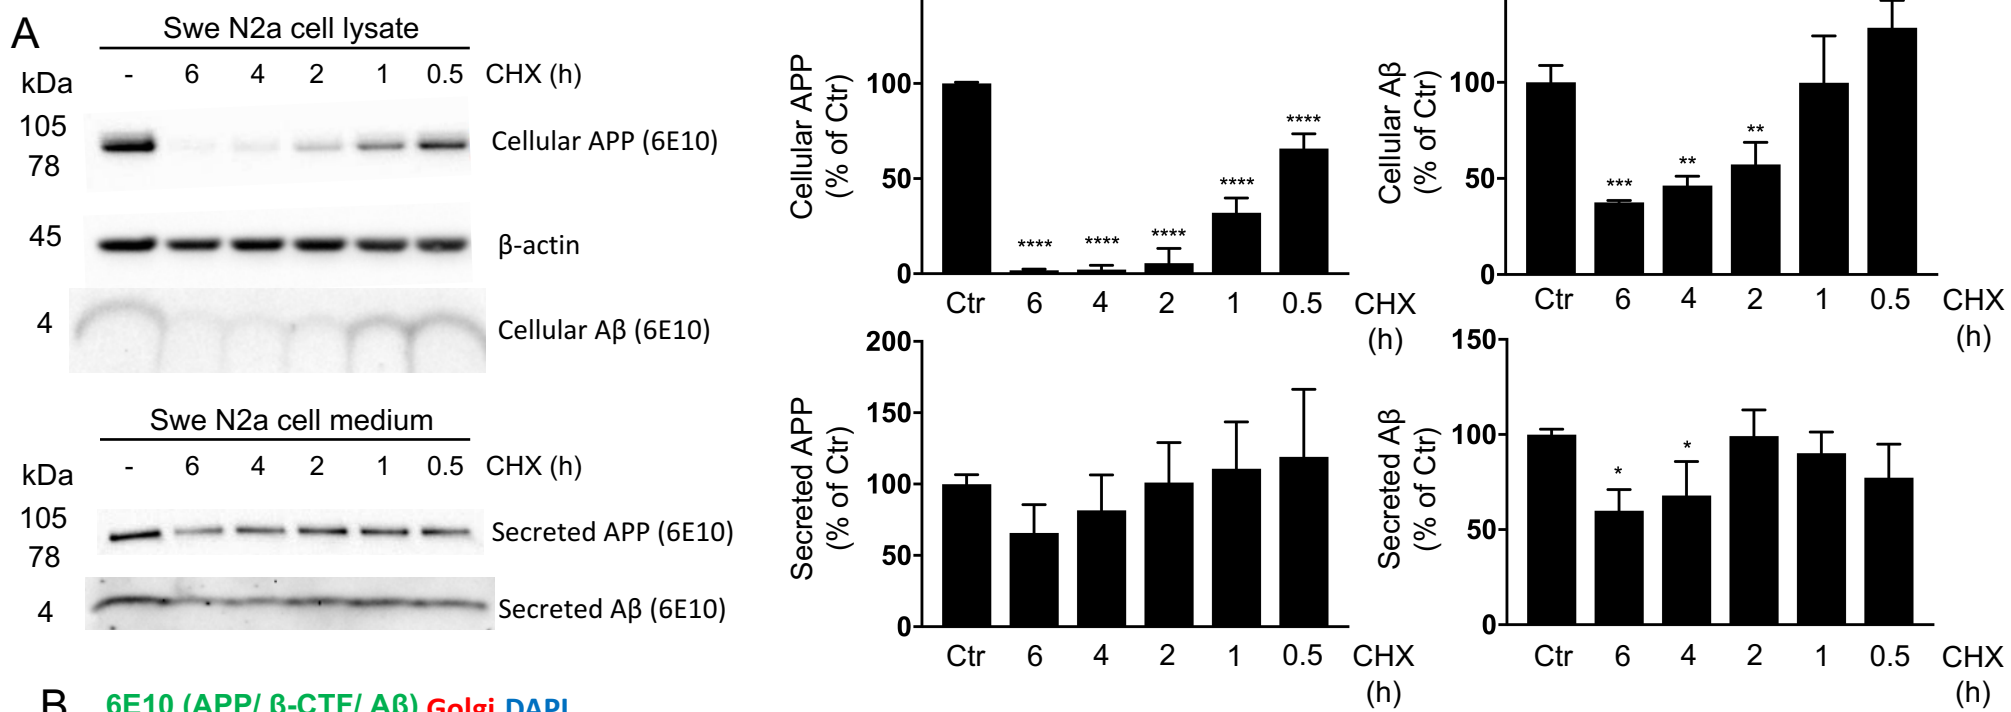

**B** **6E10 (APP/  $\beta$ -CTF/ A $\beta$ ) Golgi DAPI**

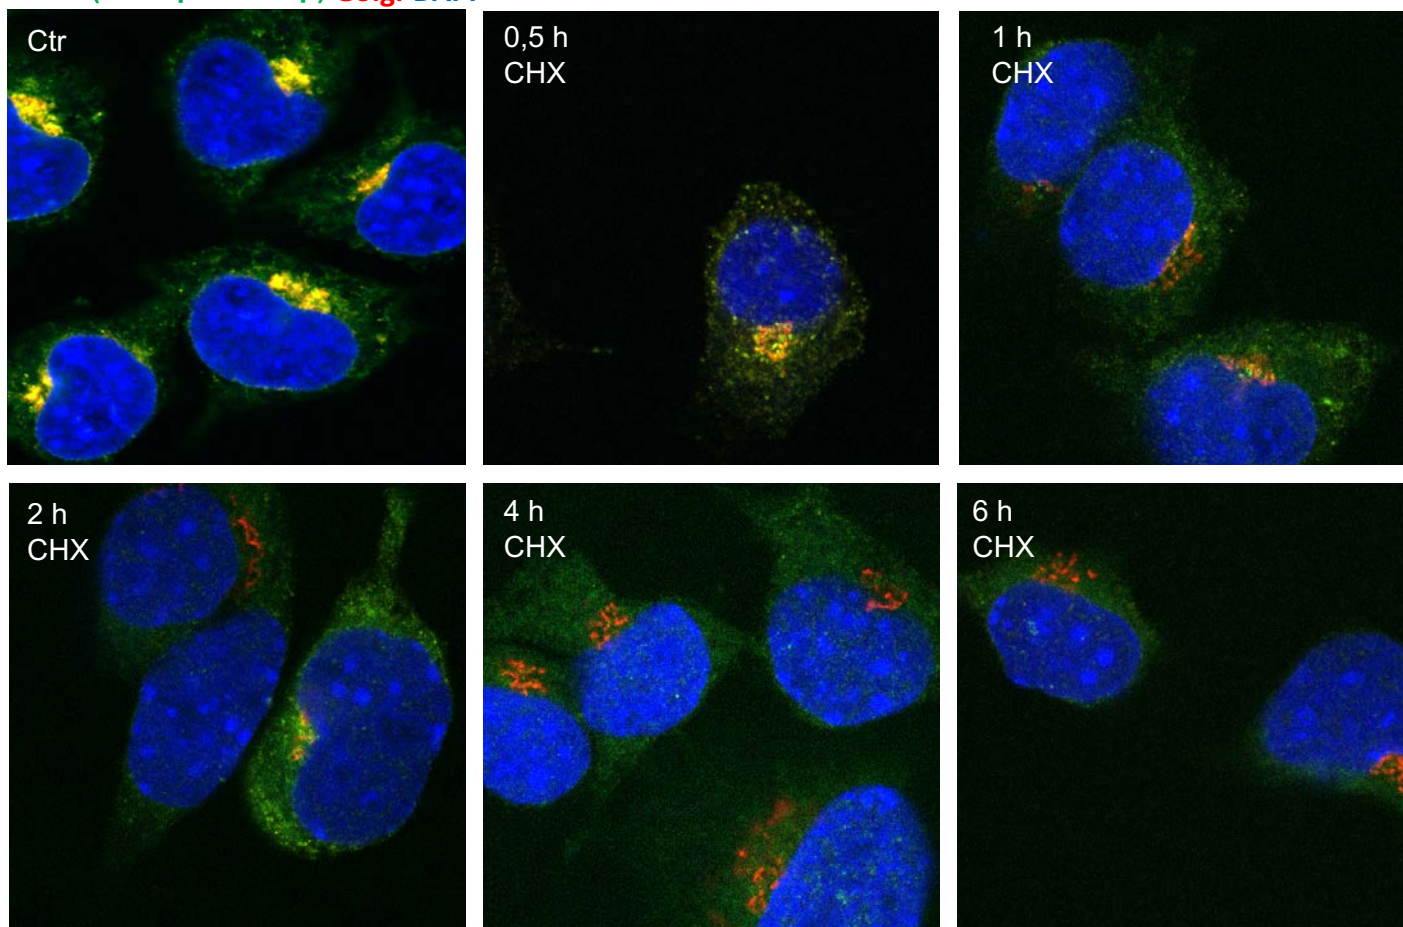

**6E10 (APP/  $\beta$ -CTF/ A $\beta$ )**

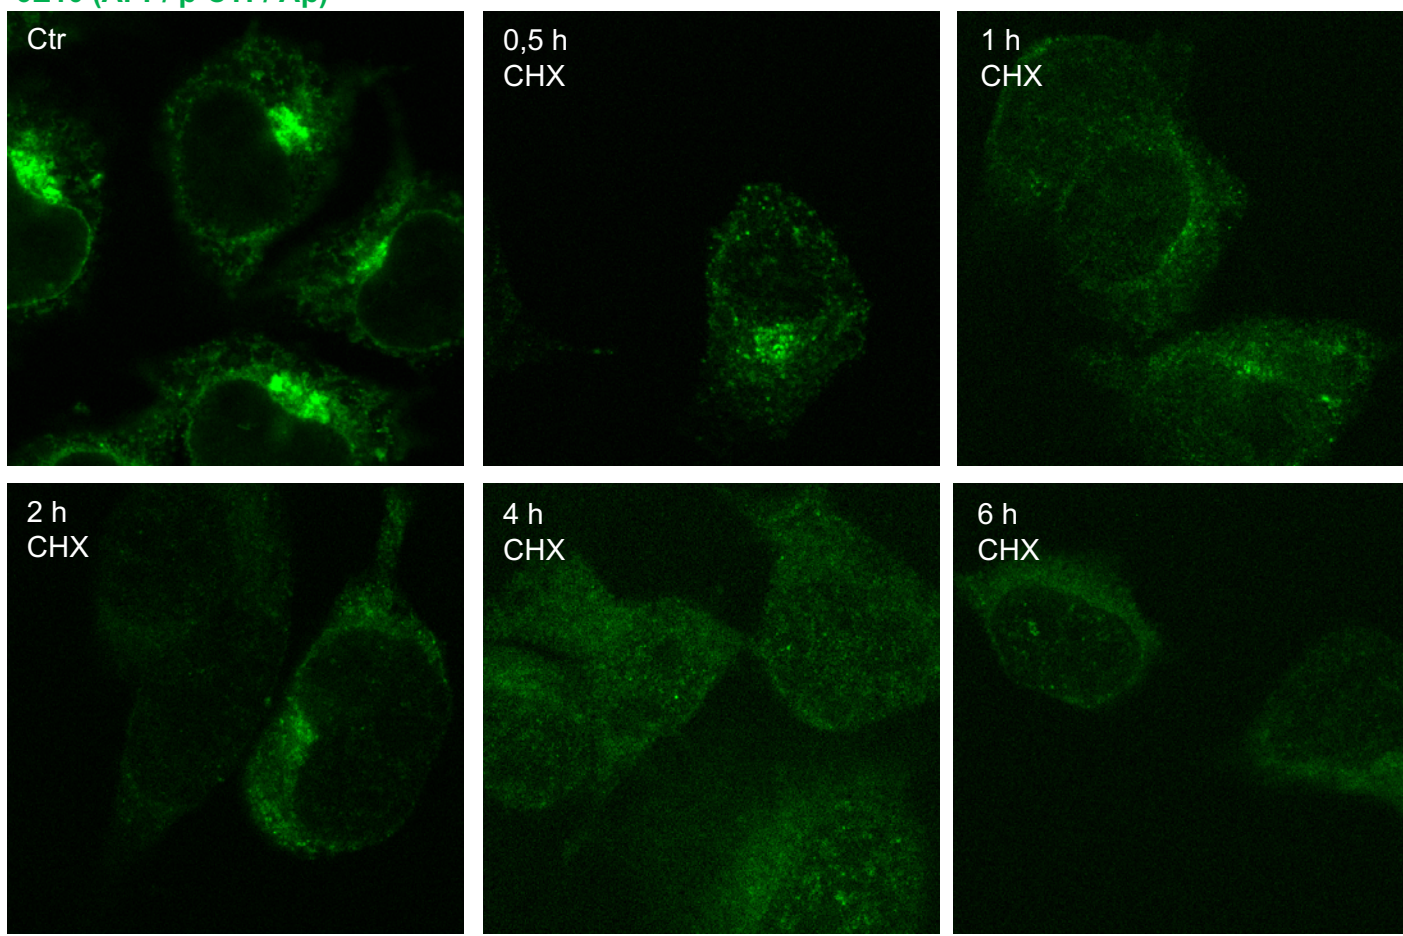

Supplement: MOESM8 [file 14235872]
